# Supplementary material for: Heterogeneity in the pyramidal network of the medial prefrontal cortex
Source: Springer Nature journal article supplement (doi:10.1038/nn1670), 2006-03-19
Supplement: nn1670-S1.pdf [file nn1670-S1.pdf]

Supplementary figures: Fig.S1 ~ S3.

Fig. S1: Facilitating time constant ( $F$ ) vs. ages of the ferrets

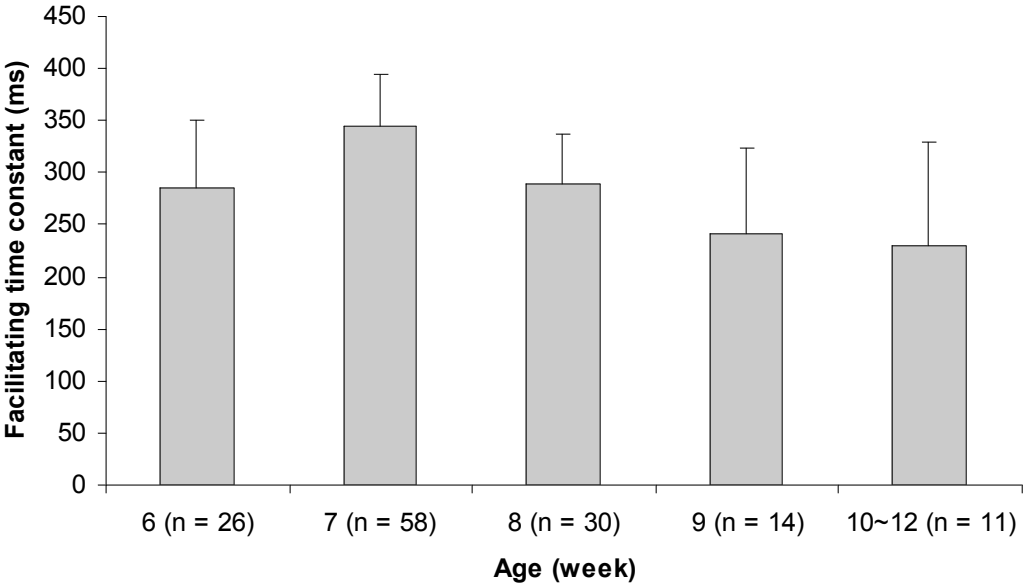

No significant difference between groups of different ages ( $P = 0.36$ , defined by ANOVA).
