# Supplementary material for: Heterogeneity in the pyramidal network of the medial prefrontal cortex
Source: Springer Nature journal article supplement (doi:10.1038/nn1670), 2006-03-19
Supplement: nn1670-S3.pdf [file nn1670-S3.pdf]

**Fig. S3:** The EPSP amplitudes and patterns of three *E*-types of excitatory connections during the train stimulations

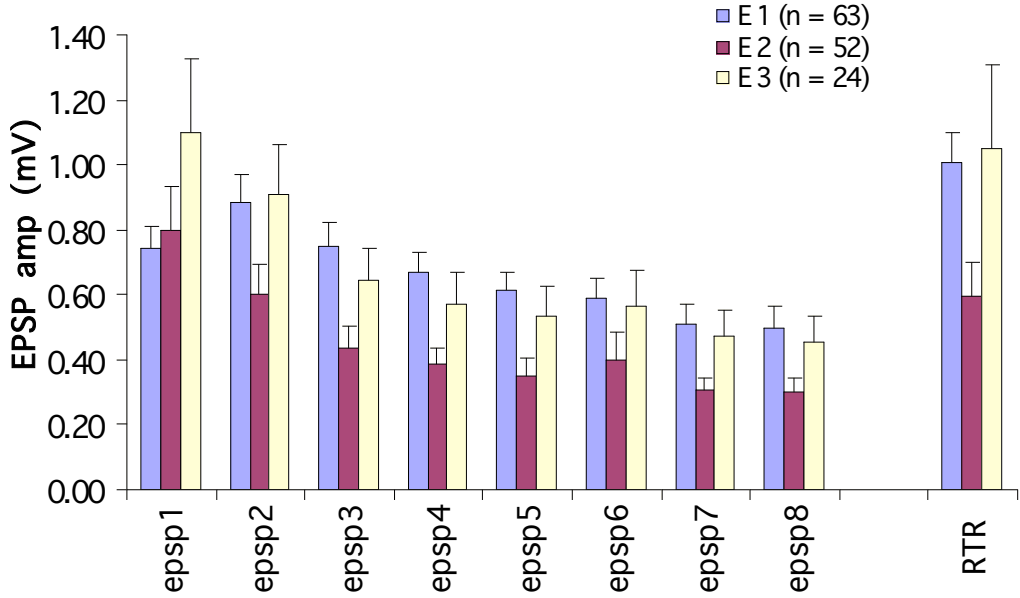

“RTR”: recovery test response that was recorded at 500 ms after the train of 6 – 8 EPSPs mostly at 20 Hz.
