# Supplementary material for: Heterogeneity in the pyramidal network of the medial prefrontal cortex
Source: Springer Nature journal article supplement (doi:10.1038/nn1670), 2006-03-19
Supplement: nn1670-S5.pdf [file nn1670-S5.pdf]

**Table S2. E –types vs. multiple parameters of PCs and synaptic connections**

|                        | n   | E1           | E2           | E3           | E1 + E3'     | P                      |                      |                        | Statistics      |
|------------------------|-----|--------------|--------------|--------------|--------------|------------------------|----------------------|------------------------|-----------------|
|                        |     |              |              |              |              | E1 vs. E2              | E3 vs. E2            | E1 vs. E3              |                 |
| SA increment/baseline  |     | 45%          | 10%          | 33%          | –            | 0.0009                 | 0.05                 | 0.25                   | two-tailed test |
| PTP increment/baseline |     | 14.9%        | 2.7%         | 1.2%         | –            | 0.001                  | 0.76                 | 0.0131                 | two-tailed test |
|                        |     |              |              |              |              | <u>E1 vs. E2</u>       | <u>E3 vs. E2</u>     | <u>E1 + E3' vs. E2</u> |                 |
| Reciprocal rate        |     | 68% (43/63)  | 23% (12/52)  | 63% (15/24)  | 66% (58/87)  | 1.4 x 10 <sup>-6</sup> | 0.0008               | 6.6 x 10 <sup>-7</sup> | chi-square test |
| sPC                    | 11  | 18% (2/11)   | 82% (9/11)   | –            | –            | 0.003                  | –                    | –                      | chi-square test |
| cPC                    | 101 | 31% (31/101) | 36% (36/101) | 23% (23/101) | 54% (54/101) | 0.45                   | 0.04                 | 0.01                   | chi-square test |
| AC-PC                  | 48  | 29% (14/48)  | 60% (29/48)  | 11% (5/48)   | 40% (19/48)  | 0.002                  | 3.0x10 <sup>-7</sup> | 0.04                   | chi-square test |
| NAC-PC                 | 80  | 38% (30/80)  | 36% (29/80)  | 26% (21/80)  | 64% (51/80)  | 0.87                   | 0.17                 | 0.0005                 | chi-square test |

NB 1: 'SA increment' was evaluated only by the amplitudes of the initial EPSPs following tetanus.

NB 2: For the different types of PCs, both pre- and postsynaptic cells were included.
