# Supplementary material for: Heterogeneity in the pyramidal network of the medial prefrontal cortex
Source: Springer Nature journal article supplement (doi:10.1038/nn1670), 2006-03-19
Supplement: nn1670-S6.pdf [file nn1670-S6.pdf]

**Table S3: Quantitative comparison of complex and simple PCs in the ferret mPFC**

|                                                        | cPC ( <i>n</i> = 35) | sPC ( <i>n</i> = 8) | <i>P</i> |
|--------------------------------------------------------|----------------------|---------------------|----------|
| Apical dendrite length (μm)                            | 6108 ± 744           | 3025 ± 1100         | 0.05     |
| Max dendritic branching order                          | 7 ± 0.6              | 6 ± 0.5             | 0.034    |
| Averaged dendritic branching order                     | 4 ± 0.23             | 3 ± 0.13            | 0.008    |
| Averaged dendritic cluster (horizontal, μm)            | 330 ± 19             | 206 ± 29            | 0.002    |
| averaged dendritic cluster (vertical, μm)              | 364 ± 22             | 232 ± 28            | 0.001    |
| Values are 'mean ± s.e.m.', two-tailed <i>t</i> -test. |                      |                     |          |
