# Supplementary material for: Heterogeneity in the pyramidal network of the medial prefrontal cortex
Source: Springer Nature journal article supplement (doi:10.1038/nn1670), 2006-03-19
Supplement: nn1670-S7.pdf [file nn1670-S7.pdf]

**Table S4. PC morph vs. physiologic types**

|                 | <i>n</i> | AC                 | NAC         | <i>P</i>             |
|-----------------|----------|--------------------|-------------|----------------------|
| <b>sPC</b>      | 4        | <b>100%</b> (4/4)  | 0           | –                    |
| <b>cPC</b>      | 70       | <b>26%</b> (18/70) | 73% (52/70) | 9 x 10 <sup>-9</sup> |
| <b><i>P</i></b> |          | 0.0016             | –           |                      |

Chi-square test was used for the statistical comparisons.
